# Supplementary material
Source: Springer Nature journal article supplement (https://www.springermedizin.de/resource/supplementary/12957_2011_796_MOESM2_ESM.pdf/9565900)

3149453

M (292.28)

3000007485053 4.62

-261.50mm

+0.0D

タケダ ショウヘイ

2010.05.07 13:35:46.701

120kV/ 175mAs

0.5s/5.0mm/0.5 x64

HP53.0

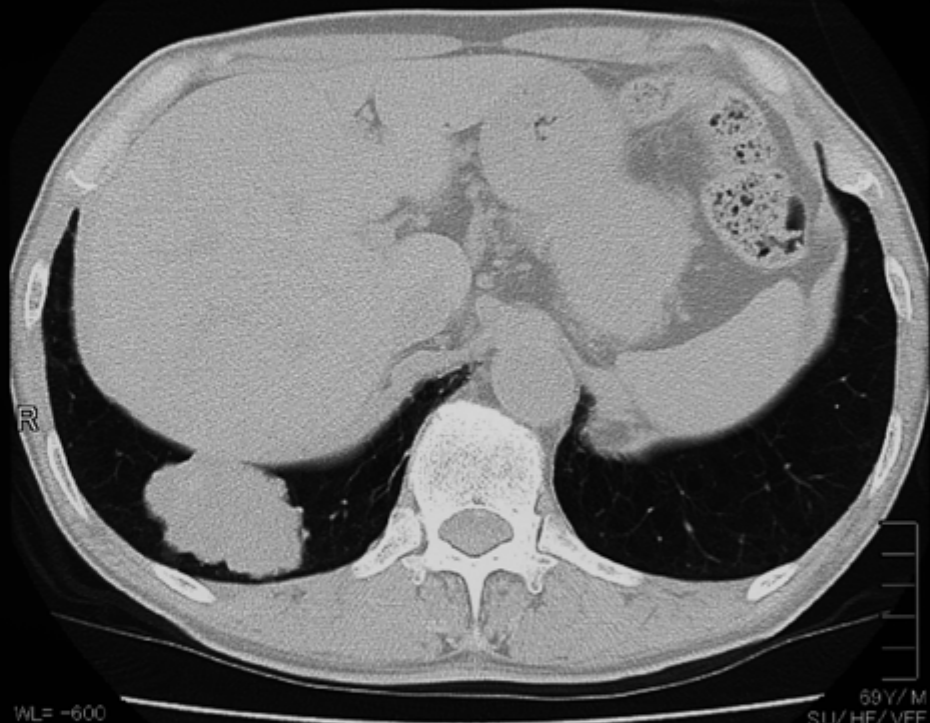

WL= -600

WW= 1600

Aquilion

P

69 Y/ M

SU/ HF/ VFF

INTERP-5/ FC53/ U06/ B

旭川医科大学病院

Supplement: MOESM2 [file 9565900]
